# Supplementary material for: Synthesis and characterization of a novel Au nanocatalyst with increased thermal stability
Source: Royal Society of Chemistry journal article supplement (doi:10.1039/c3dt52108g), 2013-10-22
Supplement: c3dt52108g.pdf [file c3dt52108g.pdf]

## Electronic Supplementary Information

### **Synthesis and characterization of a novel Au nanocatalyst with increased thermal stability**

Yiwei Zhang, Yuming Zhou<sup>\*</sup>, Zewu Zhang, Sanming Xiang, Xiaoli Sheng, Shijian Zhou, Fei Wang

*School of Chemistry and Chemical Engineering, Southeast University, Nanjing 211189, P.R.China.*

*E-mail: [ymzhou@seu.edu.cn](mailto:ymzhou@seu.edu.cn); Tel: +86 25 52090617; Fax: +86 25 52090617.*

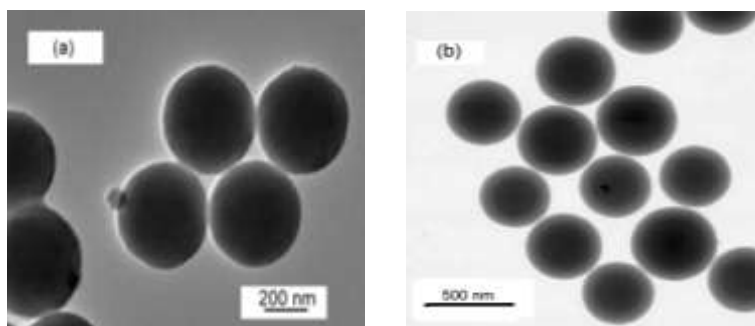

**Fig. S-1** TEM images of TiO<sub>2</sub>/SiO<sub>2</sub> spheres with different thickness prepared by multiple sol-gel coating processes: (a) twice and (b) third times.

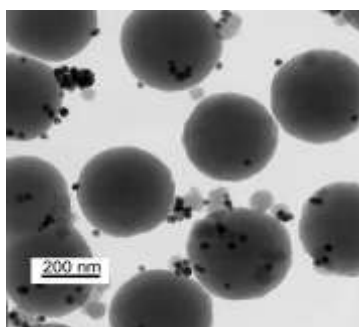

**Fig.S-2** TEM images after the deposition of Au on the surface of TiO<sub>2</sub>/SiO<sub>2</sub> spheres without the modification of APTES.

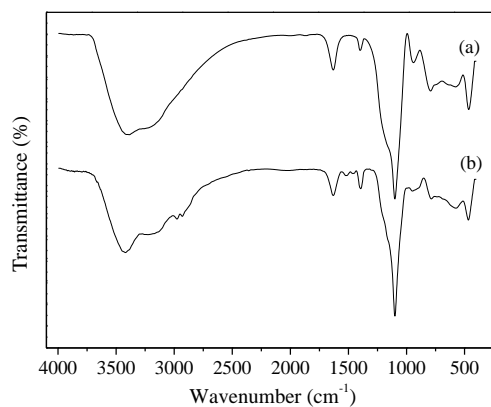

**Fig.S-3** FTIR spectra of: (a) as-prepared TiO<sub>2</sub>/SiO<sub>2</sub> nanoparticles, (b) TiO<sub>2</sub>/SiO<sub>2</sub> nanoparticles functionalized with -NHNH<sub>2</sub> group.

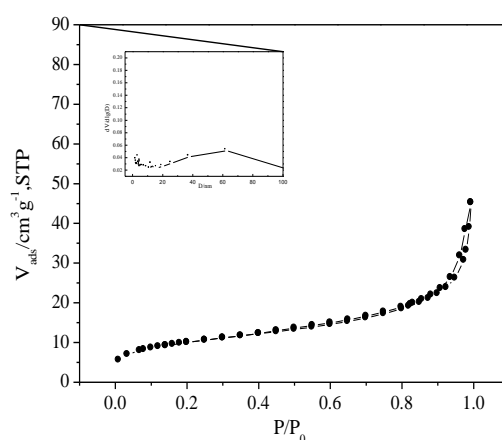

**Fig.S-4** N<sub>2</sub> adsorption / desorption isotherms of the SiO<sub>2</sub>/Au/TiO<sub>2</sub>/SiO<sub>2</sub> samples after the etching treatment for 90 min. Insert shows the corresponding pore size distribution.
